# Supplementary material
Source: PubMed Central journal article supplement (PMC8380731)

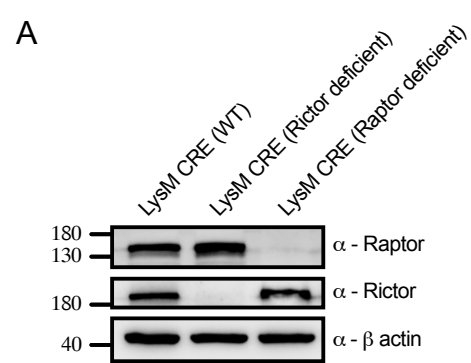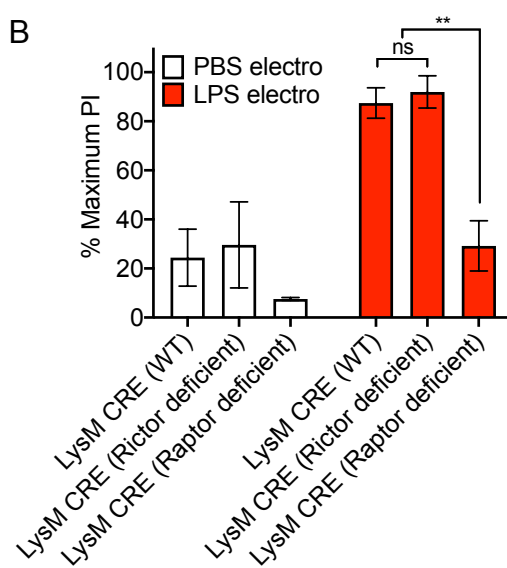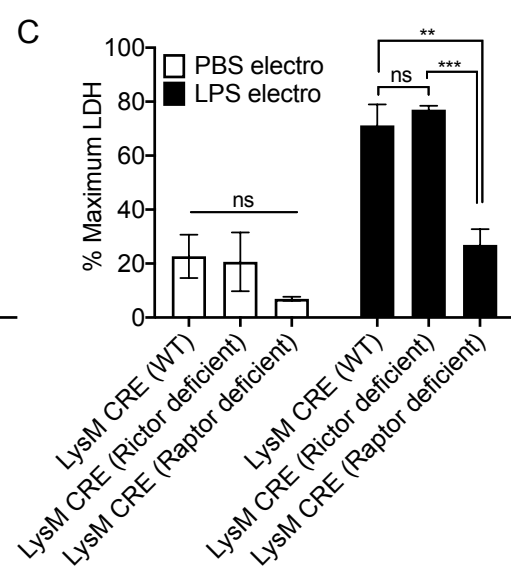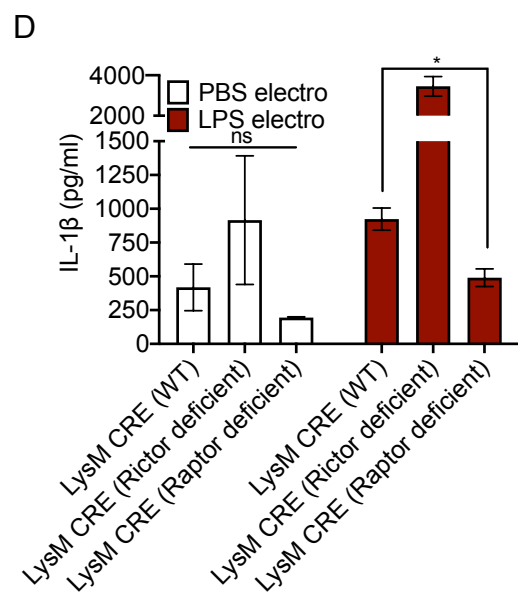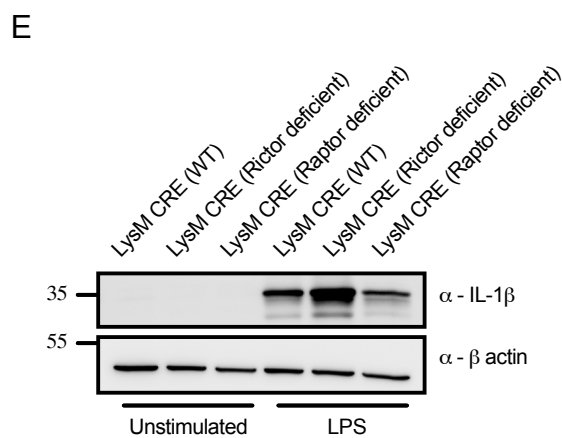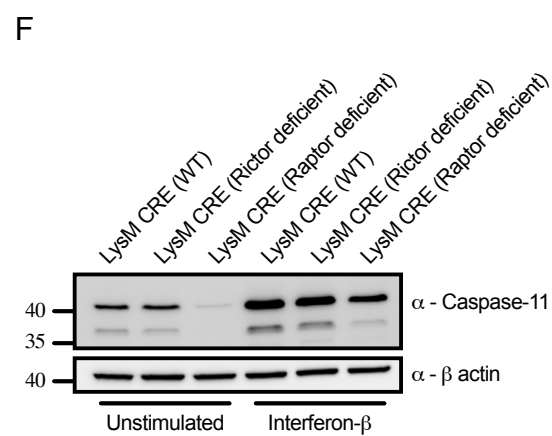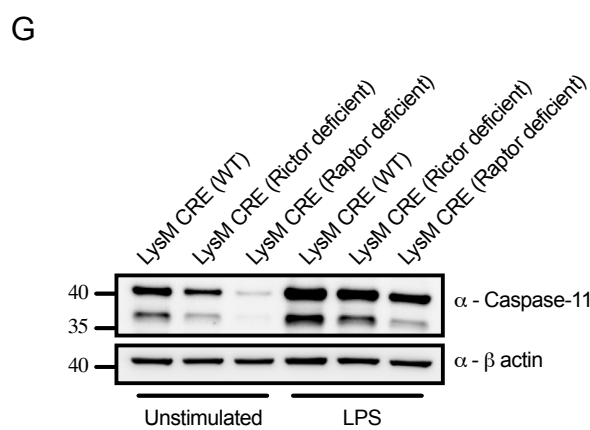

Supplement: NIHMS1720168-supplement-10.pdf [file NIHMS1720168-supplement-10.pdf]

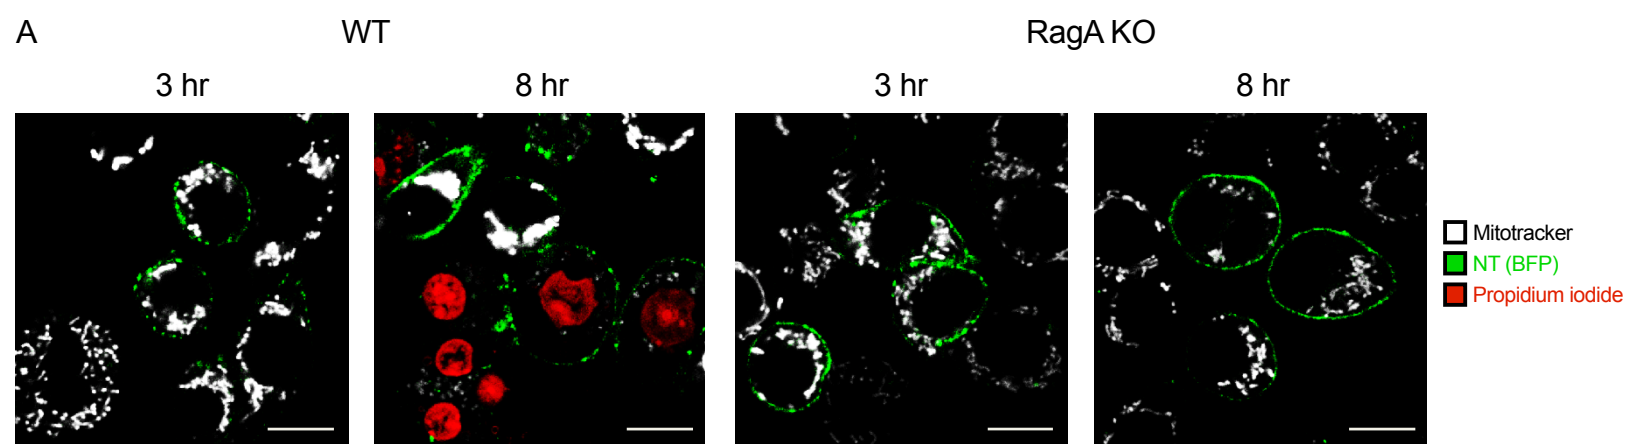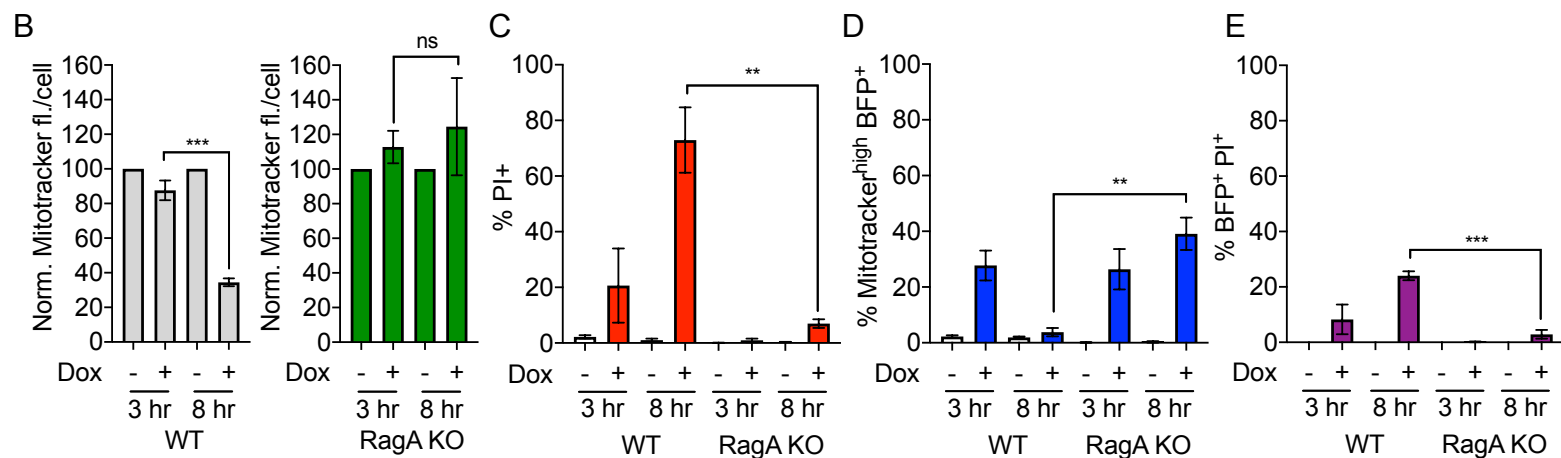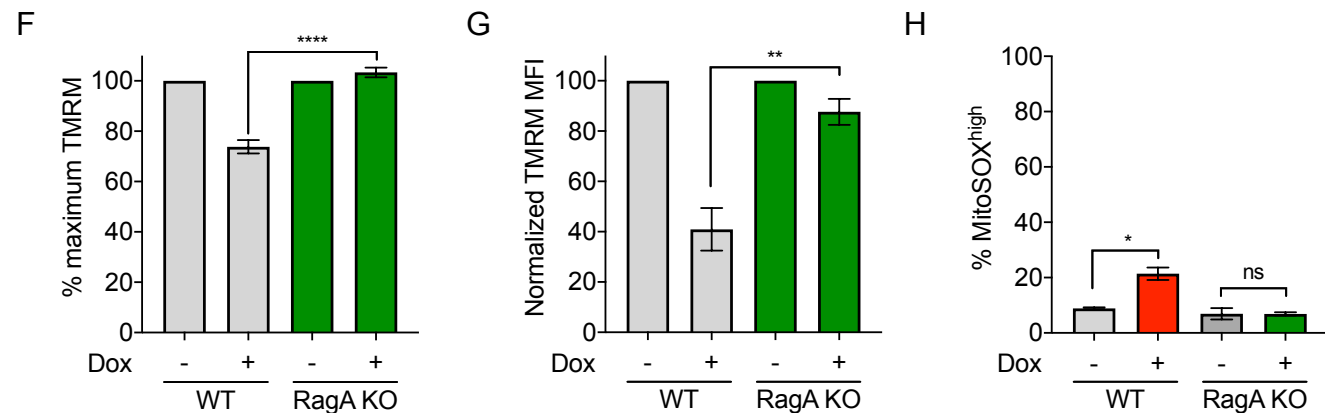

Supplement: NIHMS1720168-supplement-11.pdf [file NIHMS1720168-supplement-11.pdf]

**A**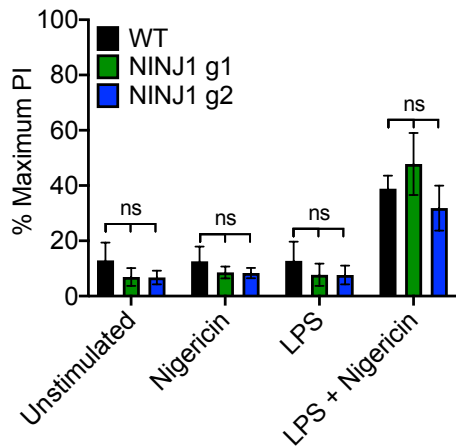**B**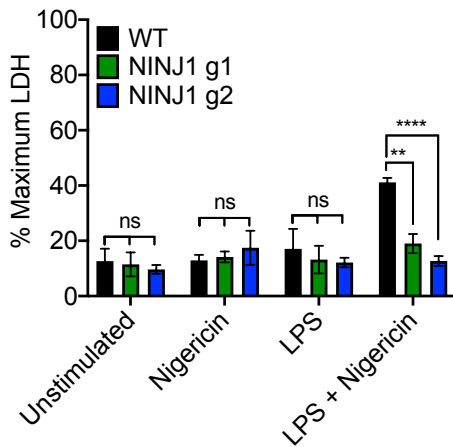**C**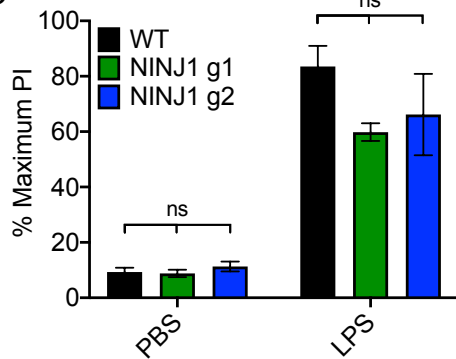**D**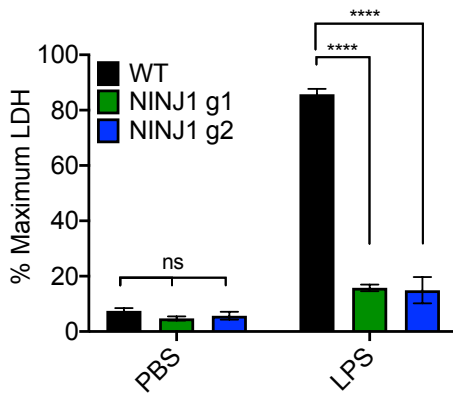

Supplement: NIHMS1720168-supplement-12.pdf [file NIHMS1720168-supplement-12.pdf]

A

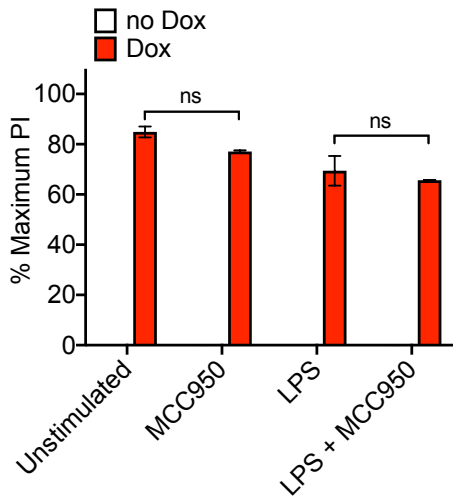

B

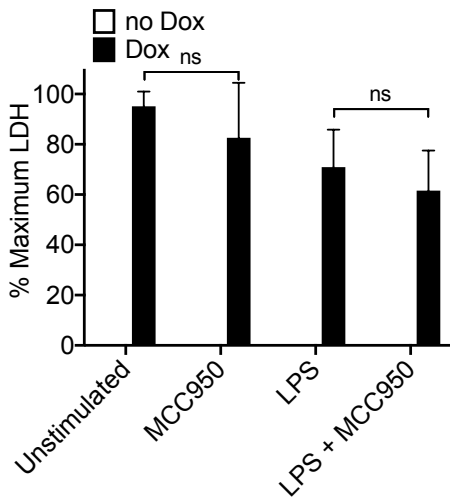

C

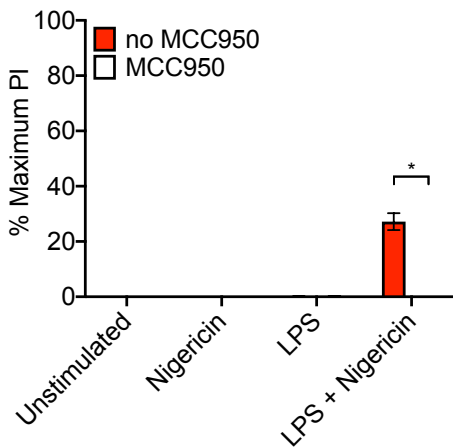

D

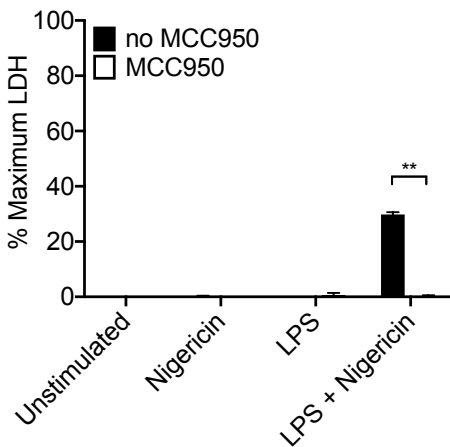

Supplement: NIHMS1720168-supplement-7.pdf [file NIHMS1720168-supplement-7.pdf]

# A

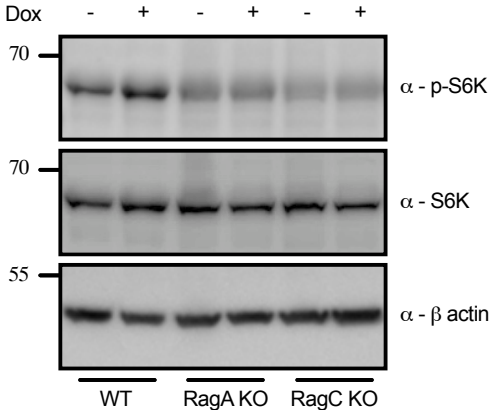

Supplement: NIHMS1720168-supplement-8.pdf [file NIHMS1720168-supplement-8.pdf]

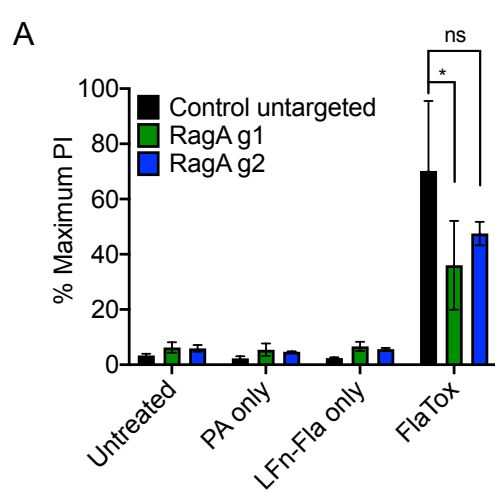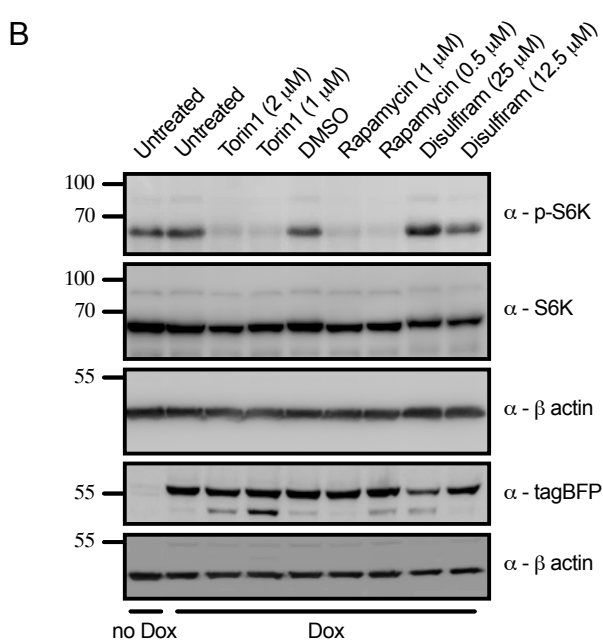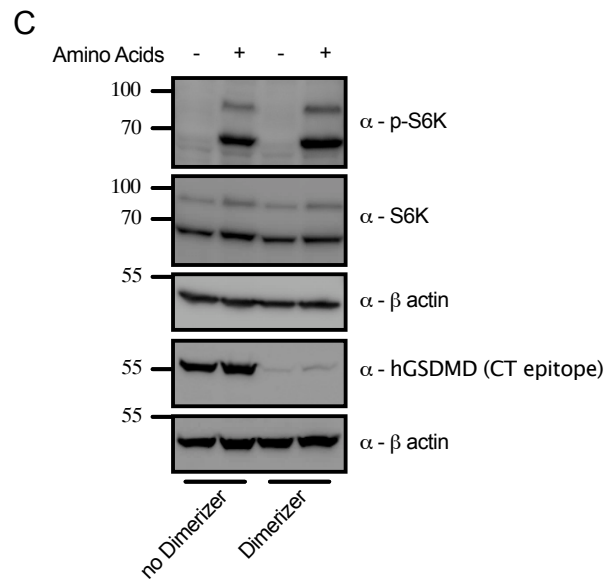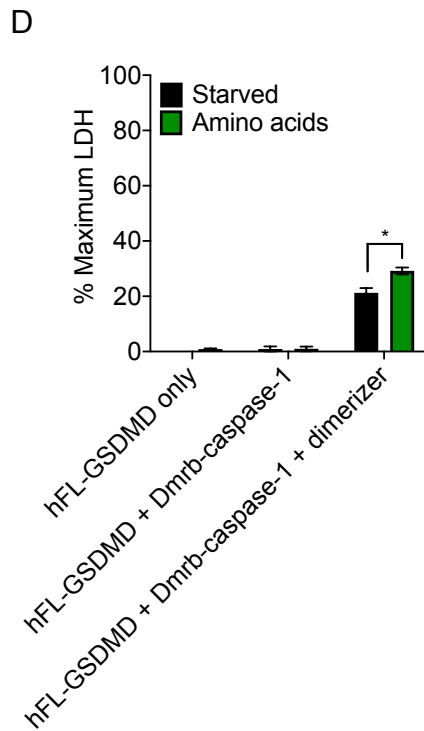

Supplement: NIHMS1720168-supplement-9.pdf [file NIHMS1720168-supplement-9.pdf]
